# Supplementary material for: Synthesis and exceptional thermal stability of Mg-based bimetallic nanoparticles during hydrogenation
Source: Royal Society of Chemistry journal article supplement (doi:10.1039/c4nr03885a), 2014-01-01
Supplement: c4nr03885a1.pdf [file c4nr03885a1.pdf]

## Supplementary Information

# Synthesis and exceptional thermal stability of Mg-based bimetallic nanoparticles during hydrogenation.

*Gopi Krishnan,<sup>\*a</sup> Raluca F. Negrea,<sup>b</sup> Corneliu Ghica,<sup>b</sup> Gert H. ten Brink,<sup>a</sup> Bart J. Kooi,<sup>a</sup> and George Palasantzas,<sup>a</sup>*

<sup>a</sup> Zernike Institute for Advanced Materials and the Materials Innovation Institute, University of Groningen, Nijenborgh 4, 9747 AG Groningen, The Netherlands.

<sup>b</sup> National Institute for Materials Physics, P.O. Box MG-7, Magurele, Ilfov, RO 77125, Romania

### Corresponding Author

\* Email: [gopi.k.krish@gmail.com](mailto:gopi.k.krish@gmail.com)

## A. Target configuration

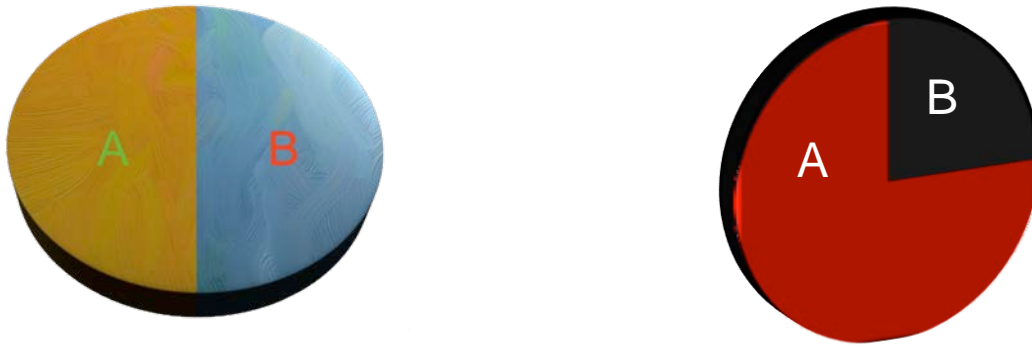

**Figure 1.** Showing the different types of section target arrangement used for the production of nanoparticles.

## B. Nanoparticle deposition source

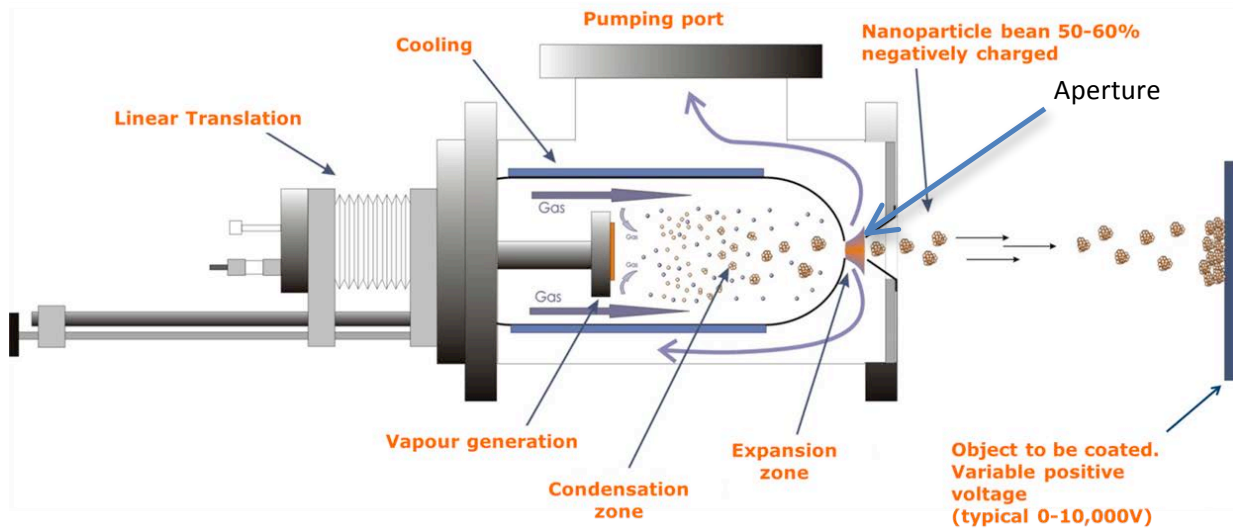

**Figure 2.** Schematic of the nanoparticle production set up (Mantis deposition Ltd).

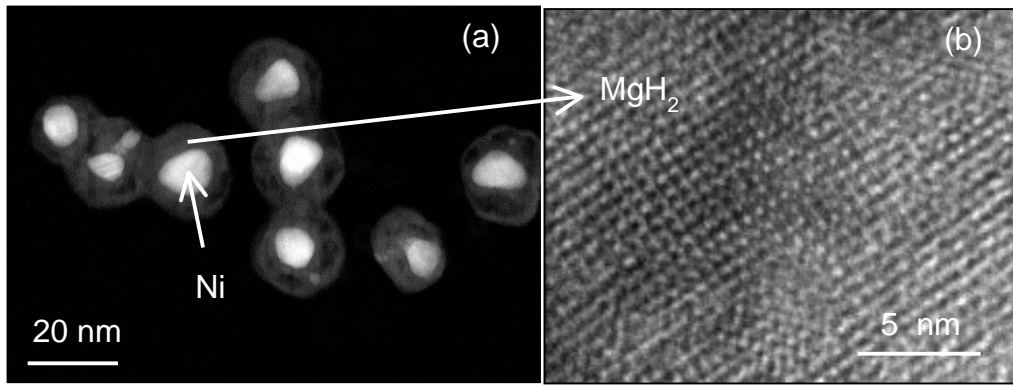

**Figure 3** (a) HAADF-STEM image of the Mg-Ni nanoparticles after hydrogenation with a phase segregated Ni core and an MgH<sub>2</sub> shell. (b) HRTEM image of an NP showing that the orthogonal (110) and (110) planes of the MgH<sub>2</sub> phase are resolved. It confirms the presence of tetragonal  $\alpha$ -MgH<sub>2</sub> structure. The arrow in which part of the NP shown in Figure 3 (a) the HRTEM image in 3 (b) was recorded.

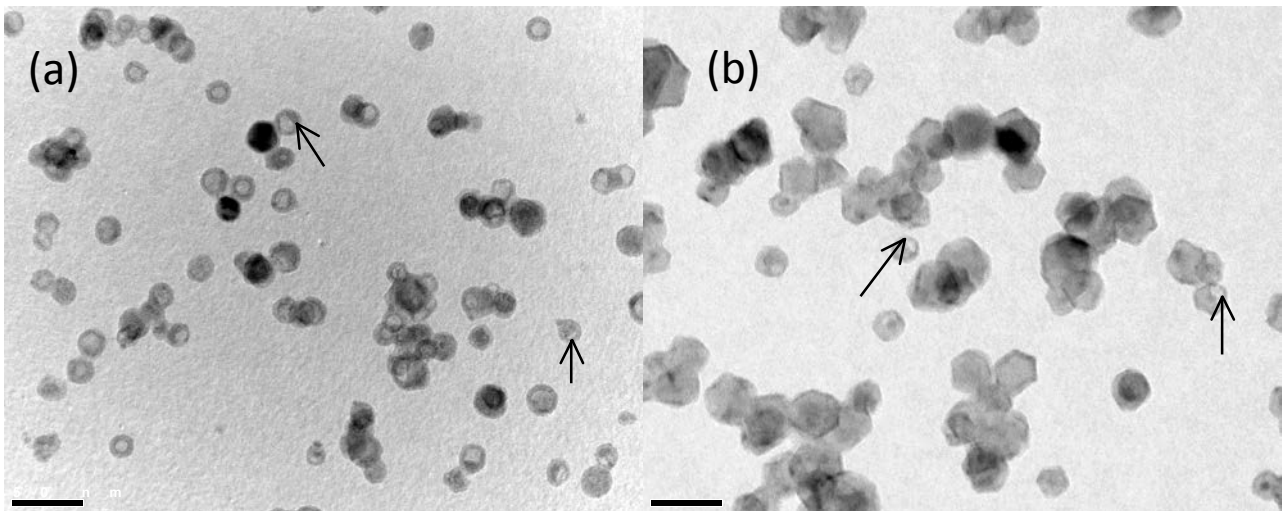

**Figure 4** Bright-field TEM image of Mg based NPs. (a) Mg-Ni nanoparticles with  $93\pm 3$  at % of Mg demonstrate void formation (hollowing) during production of the nanoparticles as also indicated by an arrow. (b) Void formation in the Mg-Ti nanoparticles with  $88\pm 3$  at % of Mg during their production. Note that the void formation depends on the nanoparticle size.

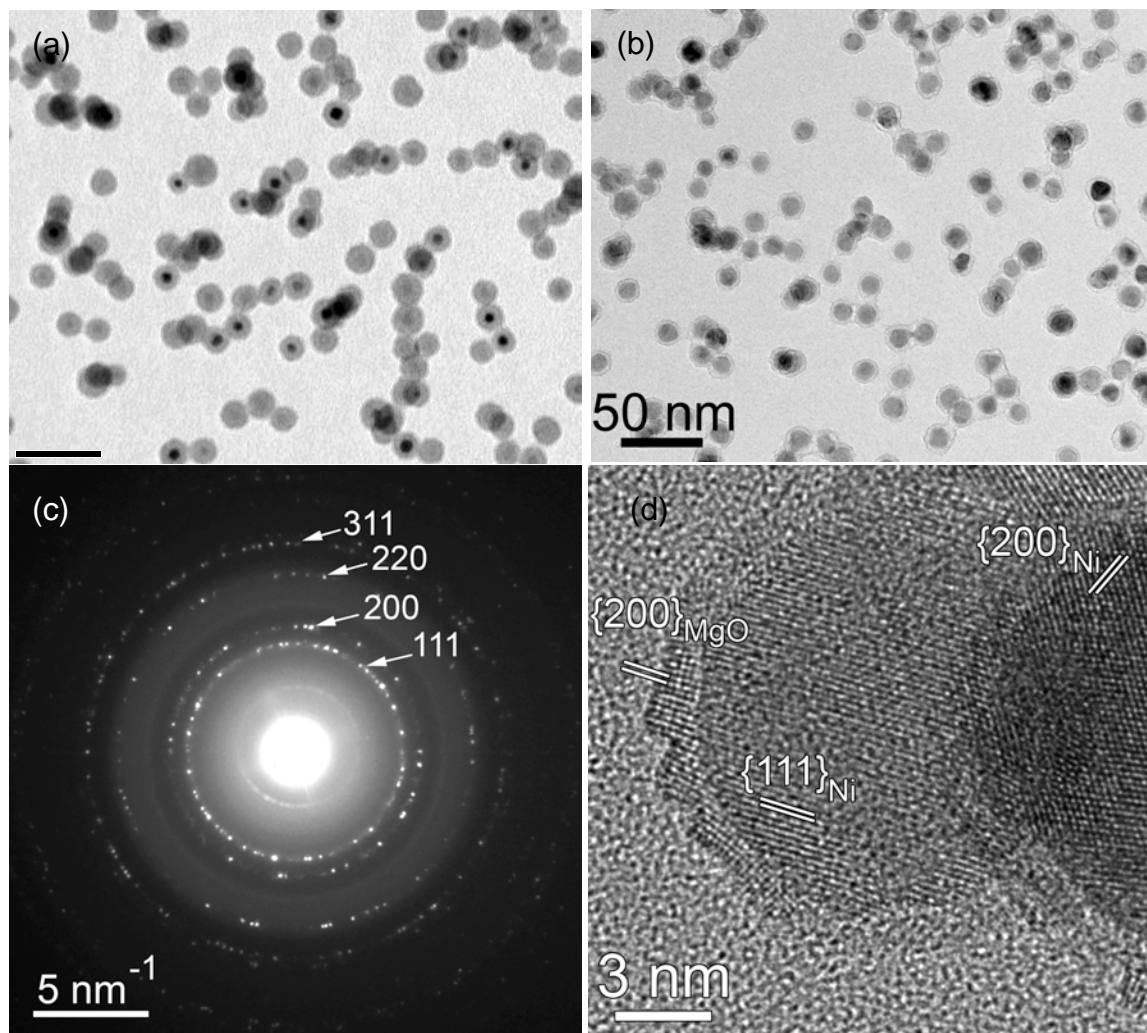

**Figure 5.** (a) Bright field TEM image of Mg-Ni NPs with multi shell structure before hydrogenation. (b) Bright field TEM image of the same Mg-Ni nanoparticles after hydrogenation at 150 °C and 5 bar H<sub>2</sub>, resulting in a Ni/MgO core-shell structure with an average core size of 10 nm and a shell of ca. 1-3 nm thickness,. (c) Corresponding SAED pattern showing cubic Ni as main crystalline phase, no Mg phase. (d) HRTEM image of Mg-Ni NPs revealing a crystalline Ni core surrounded by a crystalline MgO shell.

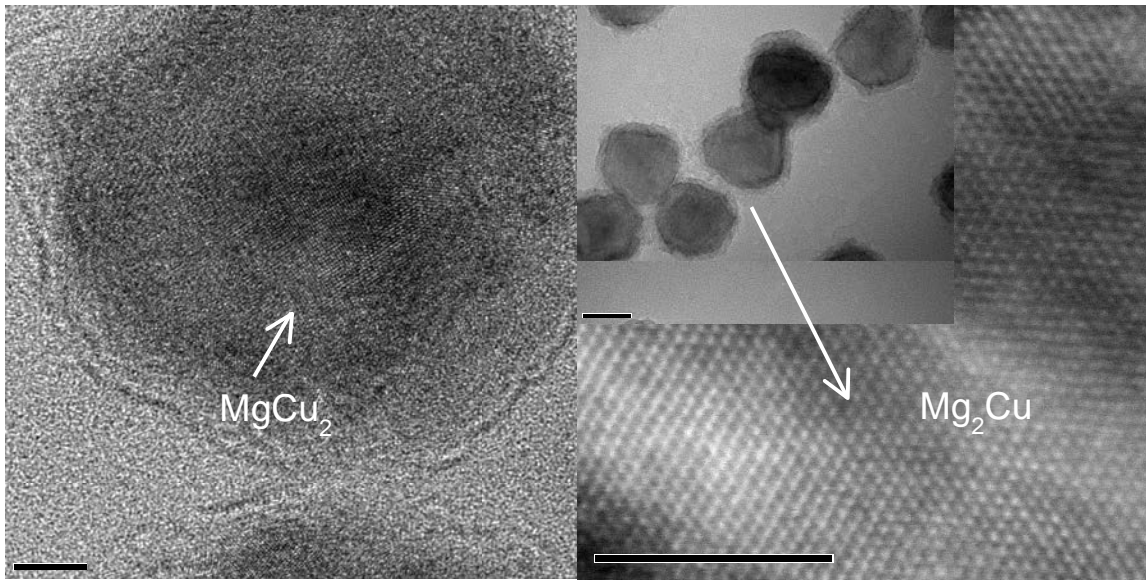

**Figure 6.** (a) HRTEM image of Mg-Cu NP formed at 0.250 Å with a multi-phase structure. The center (core) of the NP is an  $MgCu_2$  phase identified by lattice plane of (222) (b) HRSTEM image of (another) Mg-Cu NP where the  $Mg_2Cu$  phase is present in the region of the NP core. The inset shows a bright-field TEM image of Mg-Cu NPs with an arrow indicating the specific particle viewed in HRSTEM.

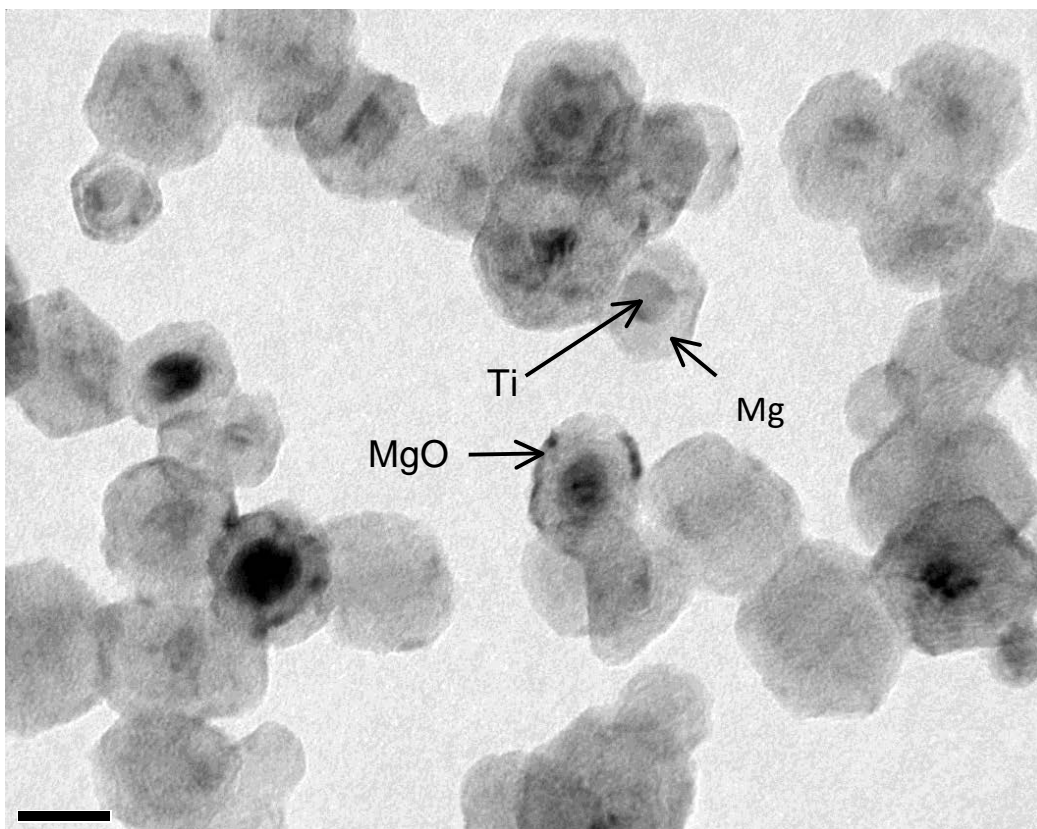

**Figure 7.** Bright-field TEM image of Mg-Ti nanoparticles produced at 0.250 A discharge current. Here, Ti act as nuclei of the Mg growth, and forms a core-shell structure as indicated in the image by an arrow. The contrast in the outer shell of the Mg-Ti NP arises from the crystalline MgO shell. It is important to note that an amorphous MgO shell is formed in the case of Mg-Ni and Mg-Cu NPs. No subsurface shell of Ti is observed here (also in contrast to Mg-Ni and Mg-Cu NPs, where such subsurface shells of Ni and Cu are present, respectively).
